# Supplementary material for: GC-MS analysis of phytoconstituents from Ruellia prostrata and Senna tora and identification of potential anti-viral activity against SARS-CoV-2
Source: PubMed Central journal article supplement — RSC Adv. 2021 Dec 17;11(63):40120–35. doi: 10.1039/d1ra06842c (PMC9044520; doi:10.1039/d1ra06842c), 2021-12-17
Supplement: RA-011-D1RA06842C-s001.pdf [file RA-011-D1RA06842C-s001.pdf]

Research Article

**GC–MS analysis of phytoconstituents from *Ruellia prostrata* and *Senna tora* and identification of potential anti-viral activity against SARS-CoV-2**

Supplementary Table

Table S1. Phytochemical compounds structure from GC-MS analysis of *R. prostrata* aerial parts.

| Compound name                                               |          | CID      | Compound Structure                                                                    |
|-------------------------------------------------------------|----------|----------|---------------------------------------------------------------------------------------|
| Z,Z,Z-1,4,6,9-Nonadecatetraene                              |          | 5362676  | 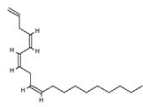   |
| 6-Heptynoic acid, methyl ester                              |          | 557075   |    |
| Cyclopentanol, 1-(1-methylene-2-propenyl)-                  | 1-(1-    | 549059   |   |
| 1,5,9,9-Tetramethyl-2-oxatricyclo[6.4.0.0(4,8)]dodecane     |          | 586811   |  |
| 1-Oxaspiro[2.2]pentane, isopropylidene-2,2,4,4-tetramethyl- | 5-       | 549662   |  |
| 1,3,3-Trimethoxybutane                                      |          | 81084    |  |
| 3-Methylbenzyl alcohol, TBDMS derivative                    | alcohol, | 22967275 |  |

|                                                                   |           |                                                                                       |
|-------------------------------------------------------------------|-----------|---------------------------------------------------------------------------------------|
| Cycloheptanone, 4-methoxy-                                        | 551377    |    |
| o-Xylene                                                          | 7237      |    |
| 2-Methylpiperidine-1-thiocarboxylic acid 2-[1-[2-pyridyl 1-oxide] | 249948356 |    |
| Glutaric acid, monochloride, 2-ethylbutyl ester                   | 91714556  |    |
| Styrene                                                           | 7501      |    |
| Pentanoic acid, 4-methyl-, methyl ester                           | 17008     |  |
| Ethyl (1-adamantylamino)carbothioylcarbamate                      | 2728763   |  |
| Decane                                                            | 15600     |  |
| 4-Methyl-2-hexanol                                                | 123156    |  |
| Benzaldehyde, 4-methyl-                                           | 7725      |  |

|                                                                  |          |                                                                                       |
|------------------------------------------------------------------|----------|---------------------------------------------------------------------------------------|
| Cyclopentanone, 2-methyl-3-(1-methylethyl)-                      | 41124    |    |
| 3-(Hydroxy-phenyl-methyl)-2,3-dimethyl-octan-4-one               | 559104   |    |
| 5-Methyl-2-benzoylimino-1,3-thiazolidine                         | 569357   |    |
| 4,5-Dimethoxy-2-[(4-methylphenyl)carbonyl]benzotrile             | 25247358 |    |
| Dodecane                                                         | 8182     |    |
| (E)-1-(2,3,6-trimethylphenyl)buta-1,3-diene (TPB, 1)             | 20585933 |  |
| Tetradecane                                                      | 12389    |  |
| Phenol, 3,5-bis(1,1-dimethylethyl)-                              | 70825    |  |
| 2(4H)-Benzofuranone, 5,6,7,7a-tetrahydro-4,4,7a-trimethyl-, (R)- | 6432173  |  |
| Methyl tetradecanoate                                            | 31284    |  |

|                                                                    |         |                                                                                       |
|--------------------------------------------------------------------|---------|---------------------------------------------------------------------------------------|
| 6-Hydroxy-4,4,7a-trimethyl-5,6,7,7a-tetrahydrobenzofuran-2(4H)-one | 14334   | 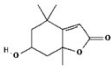   |
| Neophytadiene                                                      | 10446   |    |
| 2-Pentadecanone, 6,10,14-trimethyl-                                | 10408   |    |
| 3,7,11,15-Tetramethyl-2-hexadecen-1-ol                             | 5366244 |    |
| 3,7,11,15-Tetramethyl-2-hexadecen-1-ol                             | 5366244 |    |
| Hexadecanoic acid, methyl ester                                    | 8181    |  |
| 9,12-Octadecadienoic acid, methyl ester                            | 5284421 |  |
| 7-Hexadecenoic acid, methyl ester, (Z)-                            | 5364431 |  |
| 3,7,11,15-Tetramethyl-2-hexadecen-1-ol                             | 5366244 |  |
| Methyl stearate                                                    | 8201    |  |

|                                        |               |         |                                                                                       |
|----------------------------------------|---------------|---------|---------------------------------------------------------------------------------------|
| trans-Geranylgeraniol                  |               | 5281365 |    |
| Stigmastan-6,22-dien,<br>dedihydro-    | 3,5-          | 5364573 |    |
| Cholest-5-en-3-ol<br>carbonochloridate | (3.beta.)-,   | 111262  |    |
| Cholest-5-en-3-ol<br>carbonochloridate | (3.beta.)-,   | 111262  |    |
| Stigmasta-5,<br>acetate, (3.beta.)-    | 22-dien-3-ol, | 6432445 |   |
| Cholest-5-en-3-ol<br>carbonochloridate | (3.beta.)-,   | 111262  |  |

Supplementary Table 2. Phytochemical compounds structure from GC-MS analysis of *Senna tora* (L.) Roxb. leaves.

| Compound name               | CID | Compound Structure                                                                    |
|-----------------------------|-----|---------------------------------------------------------------------------------------|
| 2-Piperidinecarboxylic acid | 849 |  |

|                                          |          |                                                                                       |
|------------------------------------------|----------|---------------------------------------------------------------------------------------|
| 1,1-Cyclohexanedimethanol                | 250594   |    |
| Phenol, 4-(methoxymethyl)-               | 79310    |    |
| 3-Furaldehyde                            | 10351    |    |
| 4-Cyclopentene-1,3-dione                 | 70258    |    |
| 2-Ethoxyethyl 3-methylbutanoate          | 91698641 |  |
| 3-Methylbenzyl alcohol, TBDMS derivative | 22967275 |  |
| 2-Decenal, (E)-                          | 5283345  |  |
| o-Xylene                                 | 7237     |  |
| Cyclopent-4-ene-1,3-dione                | 70258    |  |

|                                                                                    |          |                                                                                       |
|------------------------------------------------------------------------------------|----------|---------------------------------------------------------------------------------------|
| 1,3,5,7-Cyclooctatetraene                                                          | 637866   |    |
| 2(5H)-Furanone                                                                     | 10341    |    |
| Bicyclo[3.1.1]heptan-3-ol, 2,6,6-trimethyl-, (1.alpha.,2.beta.,3.alpha.,5.alpha.)- | 99038    |    |
| Trimethylsilyl [(trimethylsilyloxy)benzoate 3-methyl-4-                            | 91740684 |    |
| 4,2,7-Ethanylidene-cyclopenta[b]pyran, octahydro-7a-methyl-                        | 565150   |  |
| 2-Furancarboxaldehyde, 5-methyl-                                                   | 12097    |  |
| Hydroperoxide, 1-ethylbutyl                                                        | 141085   |  |
| Carbamic acid, phenyl ester                                                        | 69322    |  |
| Carbonic acid, ethyl 2-propenyl ester                                              | 137020   |  |

|                                                                                                                                 |          |                                                                                       |
|---------------------------------------------------------------------------------------------------------------------------------|----------|---------------------------------------------------------------------------------------|
| Fumaric acid, decyl 2-methylpentyl ester                                                                                        | 91737497 | 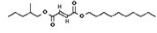   |
| 1-Propanol, 3-methoxy-2-(methoxymethyl)-2-methyl-                                                                               | 542357   |    |
| 2-Bromononane                                                                                                                   | 98219    |    |
| l-Ascorbic acid, 5,6-O-ethylboranediyl-                                                                                         | 54685836 |    |
| Octane, 4-chloro-                                                                                                               | 33574    |   |
| Methyl 6,6,8,8,10,10-hexamethyl-3-oxo-2,5,7,9,11-pentaoxa-6,8,10-trisilatridecan-13-oate                                        | 91738767 |  |
| Acetaminophen                                                                                                                   | 1983     |  |
| 2-Methyl-3-(methylthio) furan                                                                                                   | 526618   |  |
| Ent-3a-acetoxy-2b-hydroxy-13-iodomethyl-16-oxo-8,13-epi-17,20-dinorgibberell-1(10)-en-7,19-dioic acid,19,2-lactone,7-methyl est | 51136328 |  |



|                                                    |      |          |                                                                                       |
|----------------------------------------------------|------|----------|---------------------------------------------------------------------------------------|
| 7-Hexadecenal, (Z)-                                |      | 5364438  | 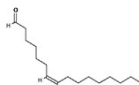   |
| 1,5-Diazabicyclo[4.3.0]non-5-ene                   |      | 76349    |    |
| Bicyclo[2.2.1]heptane-2-carboxylic isobutyl-amide  | acid | 565668   |    |
| 1-Butanol, 3-methyl-, acetate                      |      | 31276    |    |
| 3-(Hydroxy-phenyl-methyl)-2,3-dimethyl-octan-4-one |      | 559104   |   |
| Levoglucosenone                                    |      | 699486   |  |
| Phenylethyl Alcohol                                |      | 6054     |  |
| 2-(2-(2-Butoxyethoxy)ethoxy)ethyl methylbutanoate  | 2-   | 91693497 |  |
| Benzofuran, 2,3-dihydro-                           |      | 10329    |  |

|                                        |         |                                                                                       |
|----------------------------------------|---------|---------------------------------------------------------------------------------------|
| 5-Hydroxymethylfurfural                | 237332  | 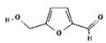   |
| Resorcinol                             | 5054    |    |
| 2-Propyl-1-heptanol                    | 24847   |    |
| Tetradecane                            | 12389   |    |
| Phenol, 3,5-bis(1,1-dimethylethyl)-    | 70825   |   |
| Pentadecane                            | 12391   |  |
| Neophytadiene                          | 10446   |  |
| 3,7,11,15-Tetramethyl-2-hexadecen-1-ol | 5366244 |  |
| 3,7,11,15-Tetramethyl-2-hexadecen-1-ol | 5366244 |  |

|                                                                                                 |         |                                                                                       |
|-------------------------------------------------------------------------------------------------|---------|---------------------------------------------------------------------------------------|
| Hexadecanoic acid, methyl ester                                                                 | 8181    |    |
| Cyclopropaneoctanoic acid, 2-[[2-[(2-ethylcyclopropyl)methyl]cyclopropyl]methyl]-, methyl ester | 534619  |    |
| 8,11,14-Docosatrienoic acid, methyl ester                                                       | 5364473 |    |
| Methyl stearate                                                                                 | 8201    |    |
| Stigmasta-5,22-dien-3-ol, acetate, (3.beta.)-                                                   | 6432445 |   |
| dl-.alpha.-Tocopherol                                                                           | 2116    |  |
| 3,4,3',4'-Tetrahydrospirilloxanthin                                                             | 5366411 |  |

Supplementary Table 3. Docking Score of *R. prostrata* 43 compounds with SARS-CoV-2 M<sup>pro</sup>

| CID            | Docking score |
|----------------|---------------|
| CID: 25247358  | -6.53         |
| CID: 70825     | -6.427        |
| CID: 41124     | -5.719        |
| CID: 5364573   | -5.68         |
| CID: 551377    | -5.673        |
| CID: 569357    | -5.409        |
| CID: 7725      | -5.285        |
| CID: 249948356 | -5.168        |

|               |        |
|---------------|--------|
| CID: 6432173  | -5.114 |
| CID: 7501     | -5.1   |
| CID: 7237     | -5.057 |
| CID: 549662   | -5.054 |
| CID: 20585933 | -4.945 |
| CID: 22967275 | -4.943 |
| CID: 559104   | -4.713 |
| CID: 14334    | -4.711 |
| CID: 549059   | -4.643 |
| CID: 81084    | -4.442 |
| CID: 2728763  | -4.344 |
| CID: 586811   | -3.906 |
| CID: 111262   | -3.896 |
| CID: 17008    | -3.822 |
| CID: 123156   | -3.783 |
| CID: 6432445  | -3.418 |
| CID: 91714556 | -3.06  |
| CID: 5281365  | -2.36  |
| CID: 15600    | -2.348 |
| CID: 557075   | -2.151 |
| CID: 10408    | -1.136 |
| CID: 5284421  | -1.116 |
| CID: 5362676  | -0.66  |
| CID: 5364431  | -0.486 |
| CID: 8181     | -0.406 |
| CID: 31284    | -0.224 |
| CID: 10446    | -0.033 |
| CID: 8201     | 0.501  |
| CID: 8182     | 1.291  |
| CID: 12389    | 1.469  |

Supplementary Table 4. Docking Score of *S. tora* 53 compounds with SARS-CoV-2 M<sup>pro</sup>

| <b>CID</b>    | <b>Docking score</b> |
|---------------|----------------------|
| CID: 70825    | -6.427               |
| CID: 54685836 | -6.222               |
| CID: 1983     | -6.067               |
| CID: 5054     | -5.954               |
| CID: 6054     | -5.717               |
| CID: 69322    | -5.655               |
| CID: 6432445  | -5.584               |
| CID: 51136328 | -5.521               |
| CID: 565668   | -5.453               |

|               |        |
|---------------|--------|
| CID: 699486   | -5.357 |
| CID: 10351    | -5.334 |
| CID: 849      | -5.321 |
| CID: 99038    | -5.307 |
| CID: 565150   | -5.296 |
| CID: 637866   | -5.196 |
| CID: 526618   | -5.171 |
| CID: 534619   | -5.089 |
| CID: 7237     | -5.057 |
| CID: 22967275 | -4.943 |
| CID: 237332   | -4.923 |
| CID: 10329    | -4.912 |
| CID: 12097    | -4.807 |
| CID: 70258    | -4.774 |
| CID: 70258    | -4.774 |
| CID: 91740684 | -4.774 |
| CID: 559104   | -4.713 |
| CID: 79310    | -4.67  |
| CID: 250594   | -4.607 |
| CID: 76349    | -4.593 |
| CID: 10341    | -4.451 |
| CID: 98219    | -4.136 |
| CID: 5364473  | -3.867 |
| CID: 2116     | -3.742 |
| CID: 31276    | -3.617 |
| CID: 91698641 | -3.603 |
| CID: 33574    | -3.592 |
| CID: 542357   | -3.495 |
| CID: 141085   | -3.157 |
| CID: 24847    | -3.104 |
| CID: 137020   | -2.138 |
| CID: 8181     | -0.406 |
| CID: 10446    | -0.033 |
| CID: 5364438  | 0.172  |
| CID: 8201     | 0.501  |
| CID: 12391    | 1.428  |
| CID: 12389    | 1.469  |
| CID: 5283345  | 1.517  |

Supplementary figure 1.

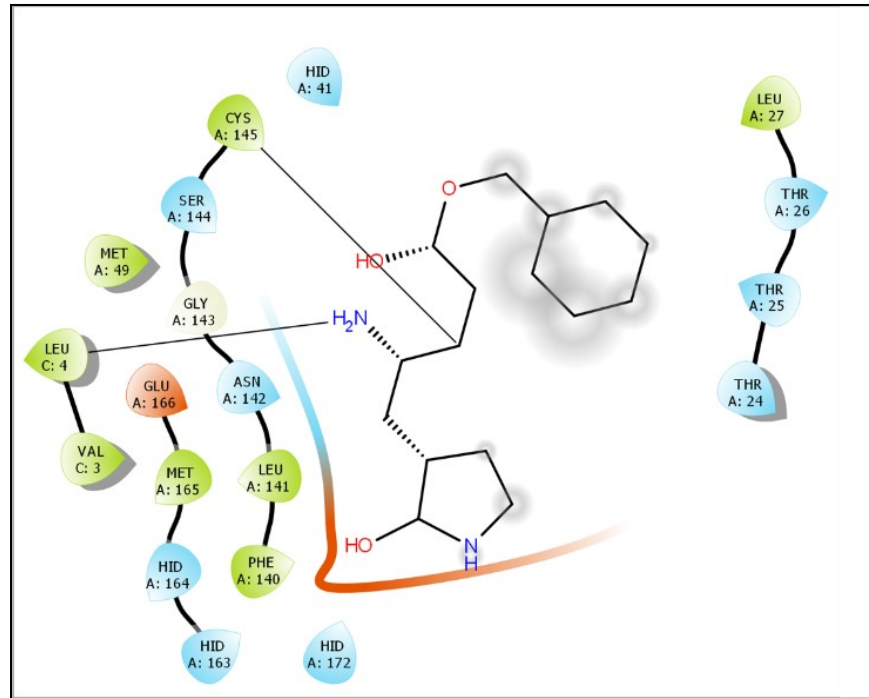

Figure S1. Binding residue with 6LU7 and N3 inhibitor.
